# Supplementary material for: Ongoing neurogenesis in the adult dentate gyrus mediates behavioral responses to ambiguous threat cues
Source: PubMed Central journal article supplement (PMC5384657; doi:10.1371/journal.pbio.2001154), 2017-04-07
Supplement: pbio.2001154.s005.pdf [file pbio.2001154.s005.pdf]

**Extinction Day 1**

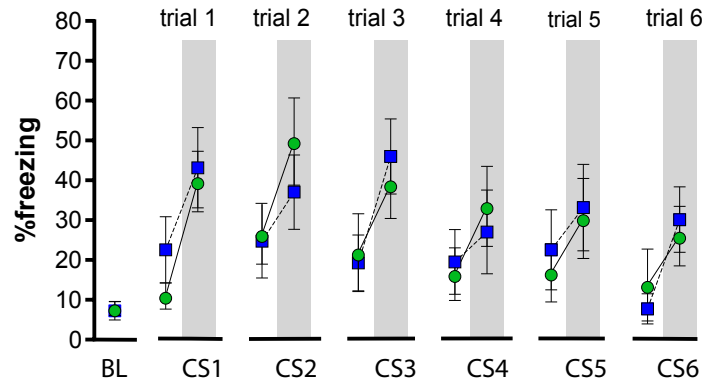

**Extinction Day 2**

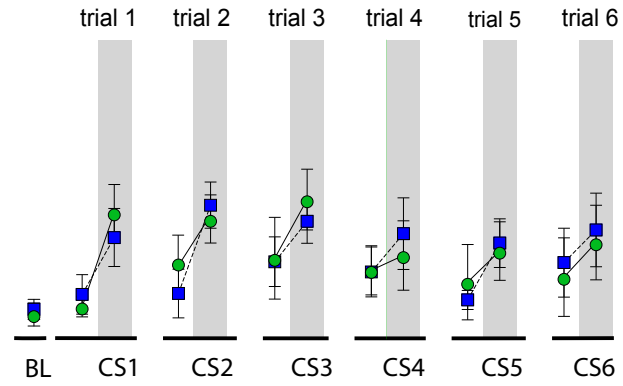

**Extinction Day 3**

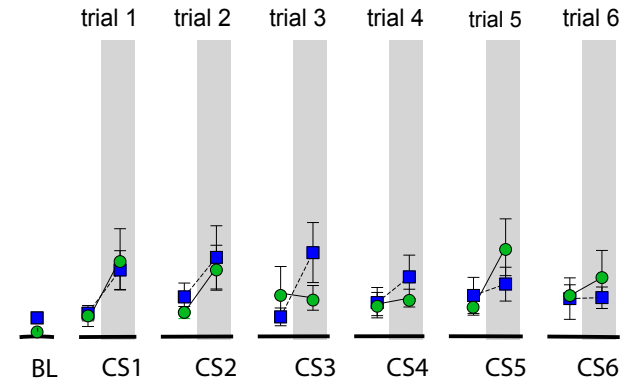

**Extinction Day 4**

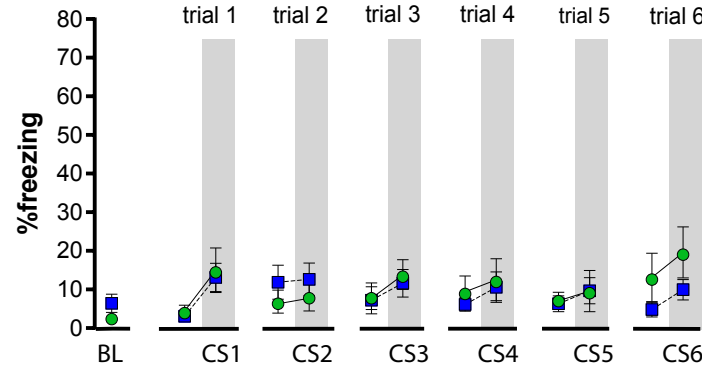

**Extinction Day 5**

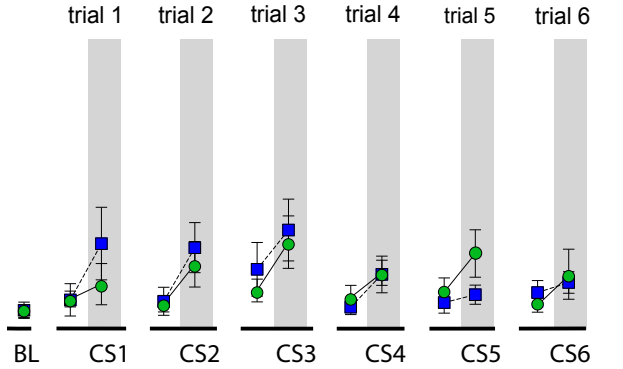

**Extinction Day 6**

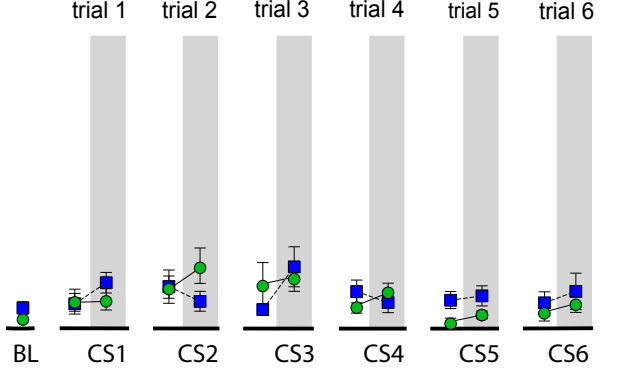

● WT  
■ TK
