# Supplementary material for: Ongoing neurogenesis in the adult dentate gyrus mediates behavioral responses to ambiguous threat cues
Source: PubMed Central journal article supplement (PMC5384657; doi:10.1371/journal.pbio.2001154), 2017-04-07

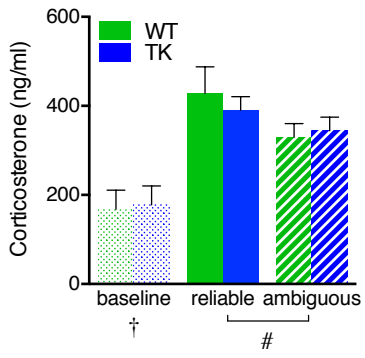

Supplement: pbio.2001154.s011.pdf [file pbio.2001154.s011.pdf]
